# Supplementary material
Source: Frontiers journal article supplement (https://www.frontiersin.org/articles/371348)
Supplement: Image_1.pdf [file Image_1.pdf]

## Supplementary Material

### The active jasmonate JA-Ile regulates a specific subset of plant jasmonate-mediated resistance to herbivores in nature

Meredith C. Schuman\*, Stefan Meldau, Emmanuel Gaquerel, Celia Diezel, Erica A. McGale, Sara Greenfield, and Ian T. Baldwin

\* **Correspondence:** Meredith C. Schuman: mschuman@ice.mpg.de

#### 1 Supplementary Data

All source data files are included as supplementary data (Schuman2018\_FPS\_Source\_Files.zip).

#### 2 Supplementary Figures

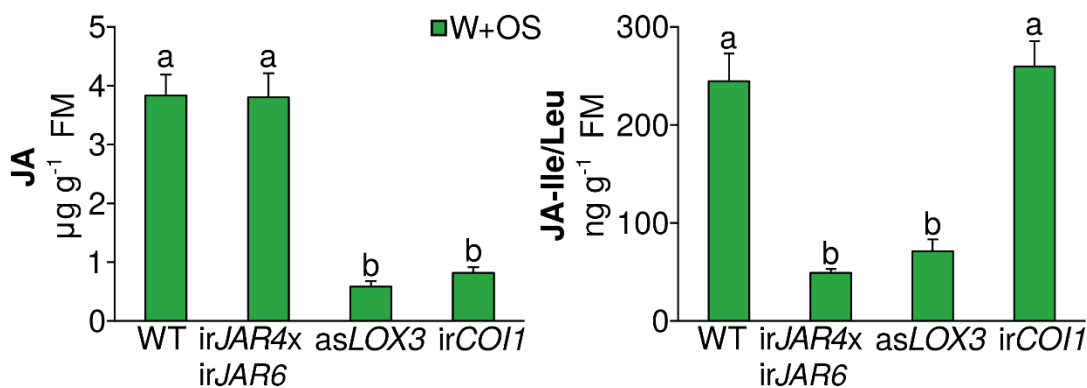

**Supplementary Figure 1.** JA and JA-Ile accumulation after mock herbivory treatment (W+OS) in WT, asLOX3, irCOI1, and irJAR4xirJAR6 plants (n = 3-5 plants); JA-Ile data for WT and irJAR4xirJAR6 plants is also shown in **Figure 3B**. <sup>a,b</sup>Different letters represent statistically significant differences (P<0.0001) in Tukey's HSD *post-hoc* tests following one-way ANOVAs with a false discovery rate correction for multiple analytes, after log transformation and mean-centering to achieve normality and homogeneity of variance. See also **Table 1** and **Figure 3B**.

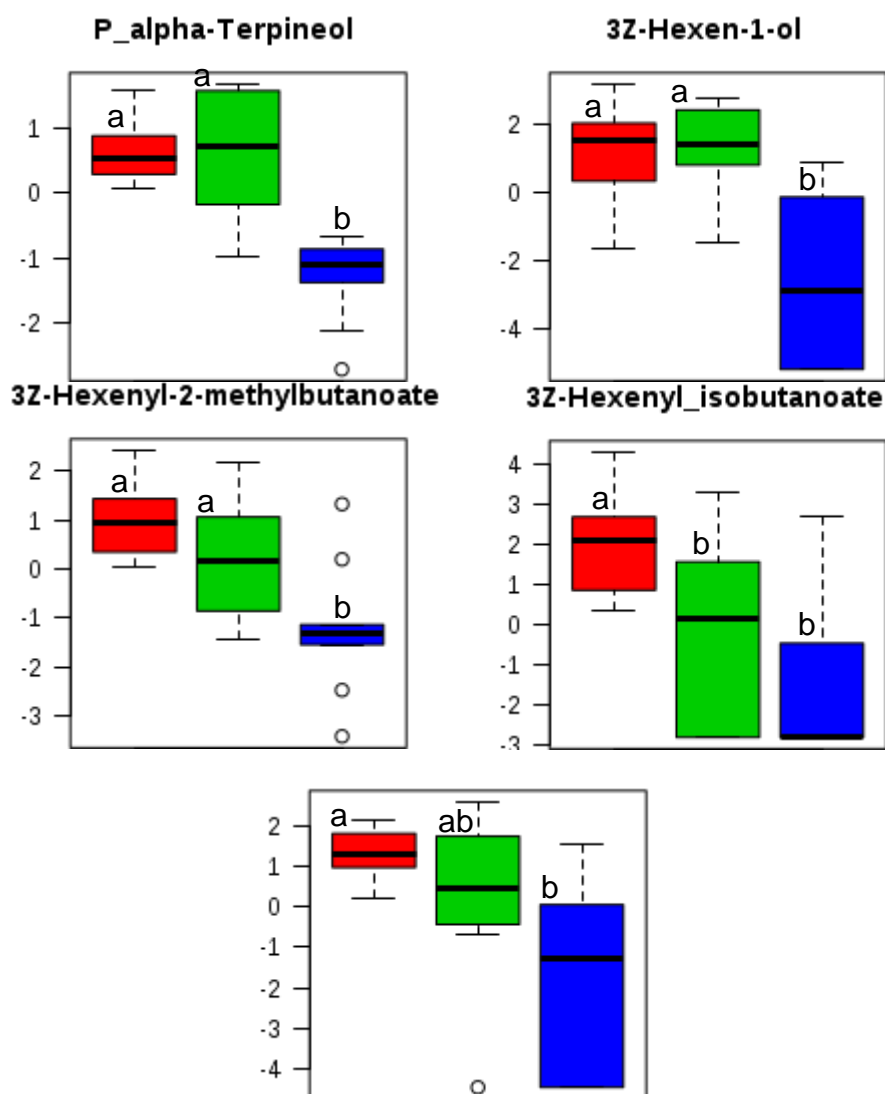

**Supplementary Figure 2.** Boxplots showing normalized peak areas of analytes which differed significantly by plant genotype (left to right: WT, red; *irJAR4xirJAR6*, green; or *asLOX3*, blue) in headspace measurements of leaves on field-grown plants before W+OS treatment (control), to accompany **Table 2** (n = 10 plants). The lowest boxplot shows data from an unidentified green leaf volatile. <sup>a,b</sup>Different letters represent statistically significant differences in Tukey *post-hoc* tests following a one-way ANOVA and corrected for multiple testing using the false discovery rate method, after log transformation and mean-centering to achieve normality and homogeneity of variance.

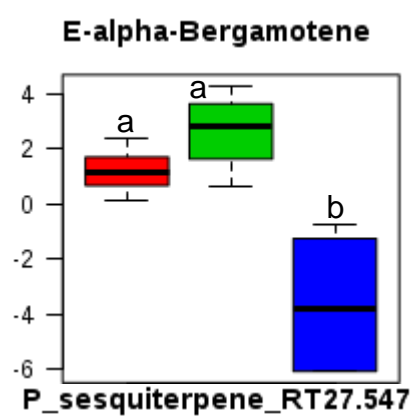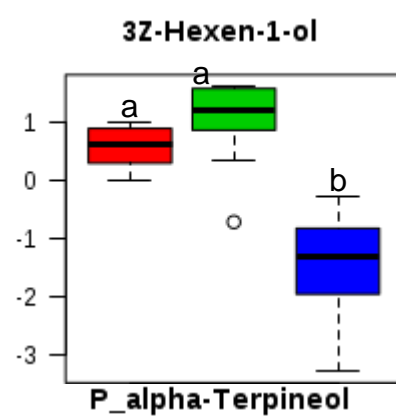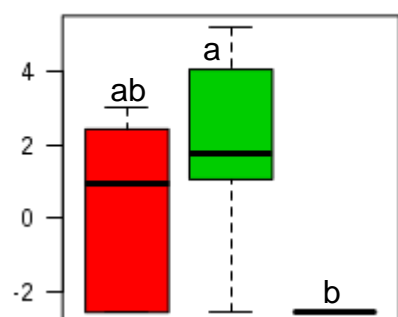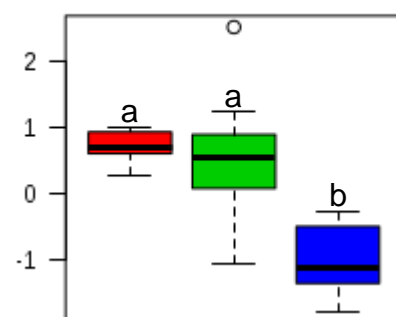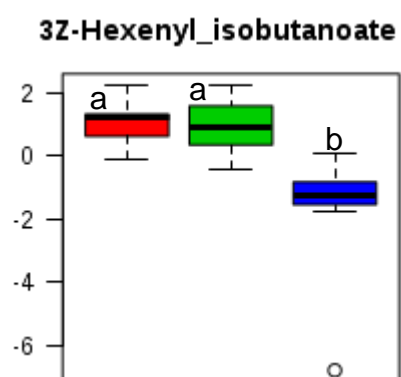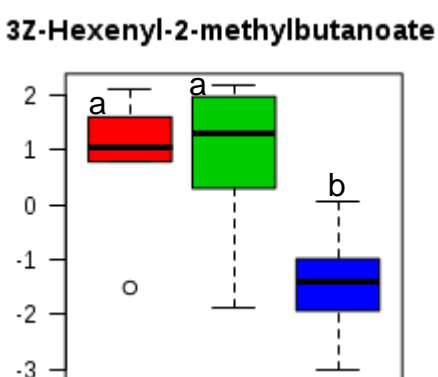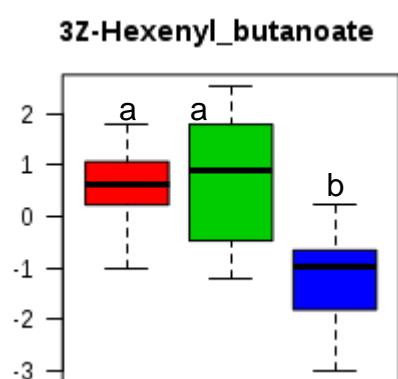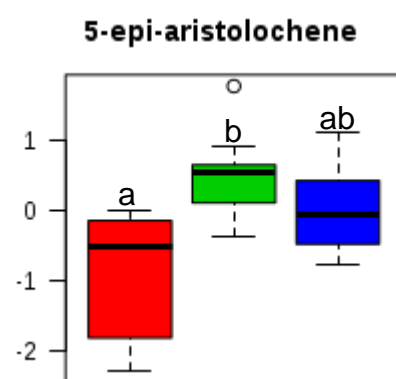

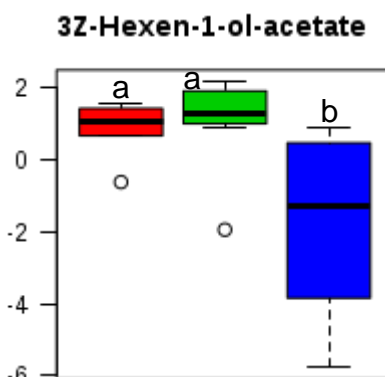

**Supplementary Figure 3.** Boxplots showing normalized peak areas of analytes which differed significantly by plant genotype (left to right: WT, red; *irJAR4xirJAR6*, green; or *asLOX3*, blue) in headspace measurements of W+OS-treated leaves on field-grown plants, to accompany **Table 2** (n = 5-8 plants). <sup>a,b</sup>Different letters represent statistically significant differences in Tukey *post-hoc* tests following a one-way ANOVA and corrected for multiple testing using the false discovery rate method, after log transformation and mean-centering to achieve normality and homogeneity of variance.

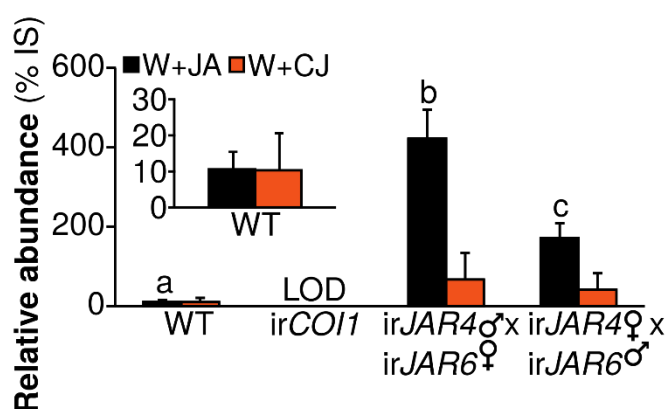

**Supplementary Figure 4.** A known jasmonate elicitor of volatiles, *cis*-jasmonate, is not more potent than JA in eliciting (*E*)-α-bergamotene emission (n = 4-5 plants). Addition of either JA or an equimolar amount of *cis*-jasmonate (CJ) affects (*E*)-α-bergamotene emission similarly in WT plants, but only JA and not *cis*-jasmonate enhances emission in *irJAR4xirJAR6* plants; results are shown separately for reciprocal crosses of the same *irJAR4* and *irJAR6* lines. <sup>a,b</sup>Different letters indicate significantly different emission of (*E*)-α-bergamotene (P < 0.05 after a Holmes-Bonferroni *post-hoc* correction) in Mann-Whitney U-tests following a significant Kruskal-Wallis test across all genotypes.

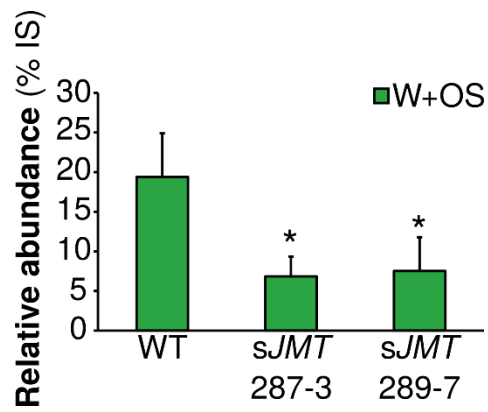

**Supplementary Figure 5.** Methyl jasmonate is not the elicitor of (*E*)- $\alpha$ -bergamotene. Two independently transformed transgenic lines ectopically expressing the *Arabidopsis thaliana* jasmonate methyltransferase (*sJMT*), which converts jasmonates to methyl jasmonate, have reduced emission of (*E*)- $\alpha$ -bergamotene from leaves following W+OS treatment (n = 9-10 plants). \**sJMT* lines differ significantly from WT (P<0.05 after a Holmes-Bonferroni *post-hoc* correction) in Mann-Whitney U-tests following a significant Kruskal-Wallis test across all genotypes.
